# Supplementary material for: Transplant Candidates of 70+ Years Have Superior Survival If Receiving Pre-Emptively a Living Donor Kidney
Source: MDPI journal article supplement (doi:10.3390/jcm13071853), 2024-03-23
Supplement: s1 [file s1]

**Supplemental Material table of content:**

Supplemental Table S1

Supplemental Table S2

Supplemental Table S1

| Cause of death during follow-up of 349 recipients aged 70 years and older |            |
|---------------------------------------------------------------------------|------------|
| Cardiovascular disease                                                    | 29 (20.7%) |
| malignancy                                                                | 25 (17.8%) |
| infection                                                                 | 38 (27.1%) |
| other                                                                     | 10 (7.1%)  |
| unknown                                                                   | 38 (27.1%) |
| Total number deceased recipients                                          | 140        |

Supplemental Table S2

| Rejection by Banff classification in kidney biopsies during follow-up of 349 recipients aged 70 years and older |            |
|-----------------------------------------------------------------------------------------------------------------|------------|
| Borderline T cell mediated rejection                                                                            | 9 (11.6%)  |
| T cell mediated rejection 1A                                                                                    | 9 (11.6%)  |
| T cell mediated rejection 1B                                                                                    | 5 (6.5%)   |
| T cell mediated rejection 2A                                                                                    | 28 (36.4%) |
| T cell mediated rejection 2B                                                                                    | 7 (9.1%)   |
| T cell mediated rejection 3                                                                                     | 3 (3.9%)   |
| Active antibody-mediated rejection                                                                              | 13 (16.7%) |
| Chronic-active antibody-mediated rejection                                                                      | 3 (3.9%)   |
| Total number of rejections                                                                                      | 77         |
